# Supplementary material for: Successional Development of the Phototrophic Community in Biological Soil Crusts on Coastal and Inland Dunes
Source: MDPI journal article supplement (doi:10.3390/biology12010058), 2022-12-29

# Successional development of the phototrophic community in biological soil crusts on coastal and inland dunes

Sandra Kammann<sup>1</sup>, Ulf Schiefelbein<sup>2</sup>, Christian Dolnik<sup>3</sup>, Tatiana Mikhailyuk<sup>4</sup>, Eduard Demchenko<sup>4</sup>, Ulf Karsten<sup>1</sup>, Karin Glaser<sup>1</sup>

<sup>1</sup> Institute for Biological Sciences, Applied Ecology and Phycology, Rostock University, Albert-Einstein-Straße 3, 18059 Rostock, Germany

<sup>2</sup> Botanical Garden, University of Rostock, Schwaansche Straße 2, 18055 Rostock, Germany

<sup>3</sup> Institute for Natural Resource Conservation, Landscape Ecology, Kiel University, Ohlshausenstr. 40, 24098 Kiel, Germany

<sup>4</sup> M. G. Kholodny Institute of Botany, National Academy of Science of Ukraine, Tereshchenkivska St. 2, Kyiv UA-01601, Ukraine

**Table S1:** Overview of all defined functional biotic and abiotic groups used to determine the dune surface coverage. Abbreviations of these groups, a short description, a color code, and visual examples of each functional group are given.

| Category                      | Short | Description                                                                                                          | Code |                                                                                       |
|-------------------------------|-------|----------------------------------------------------------------------------------------------------------------------|------|---------------------------------------------------------------------------------------|
| Vascular plants               | VP    | Tracheophyta                                                                                                         |      |  |
| Bare sediment/sand            | Ba    | No vegetation or biocrust visible, loose sand layer                                                                  |      |  |
| Litter                        | Li    | Litter layer i.e. needles, leaves, branches                                                                          |      |  |
| <b>Biocrust</b>               |       |                                                                                                                      |      |                                                                                       |
| Green algae                   | GA    | Early successional stage, slightly brittle, <3 mm thick, greenish-shimmering                                         |      |  |
| Green algae-dominated /mosses | GA/M  | Stable green crust, occasionally mosses                                                                              |      |  |
| Moss-dominated                | MD    | biocrust dominated by mosses, partly many algae species (mostly green algae), several cm thick/high                  |      |  |
| Moss-dominated /lichens       | MD/L  | MD-type, occasionally lichens (mostly chlorolichens), many algae species (mostly green algae), several cm thick/high |      |  |

**Figure S1:** Sampling plot (1 m<sup>2</sup>) divided into 16 equal subplots (0.0625 m<sup>2</sup>) with 25 cm x 25 cm (0.0625 m<sup>2</sup>) grid of 25 intersections. A metal pin was dropped next to each intersection, and the ground covering functional group, including bare sediment, was recorded.

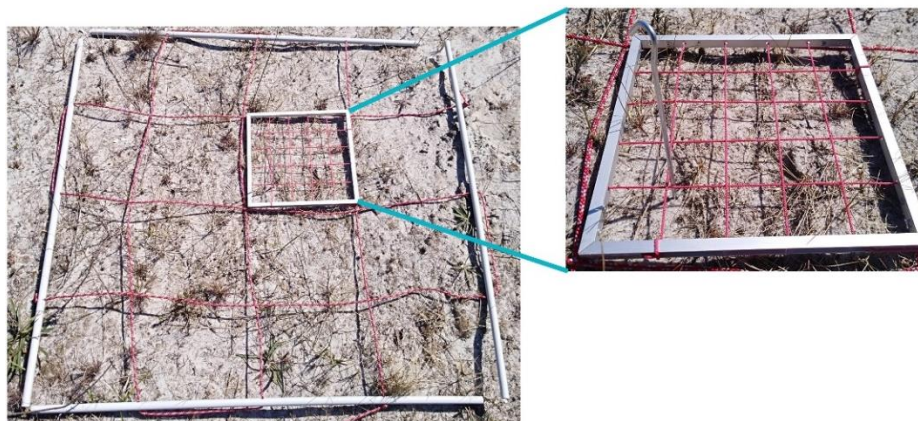

**Table S2:** Chlorophyll *a* content (mg m<sup>-2</sup>) for biocrusts or sediment (\*) along both dune chronosequences.

| Study site      | Dune area    | Sampling plot | Chl <i>a</i> (mg m <sup>-2</sup> ) |
|-----------------|--------------|---------------|------------------------------------|
| Schaabe (Rügen) | Coastal dune | FD            | 0*                                 |
|                 |              | ID            | 161.34 ± 56.51                     |
|                 |              | GD            | 150.92 ± 26.49                     |
|                 |              | MD            | 287.63 ± 49.07                     |
| Verden (Aller)  | Inland dune  | DC            | 5.86*                              |
|                 |              | DS            | 112.07 ± 20.0                      |
|                 |              | DF            | 210.80 ± 109.01                    |

**Figure S2:** Venn diagrams showing the total species number of (A) algae, (B) mosses, and (C) lichens at the two sampling sites. The number of species that were found at both sites are represented as an overlap between the two circles.

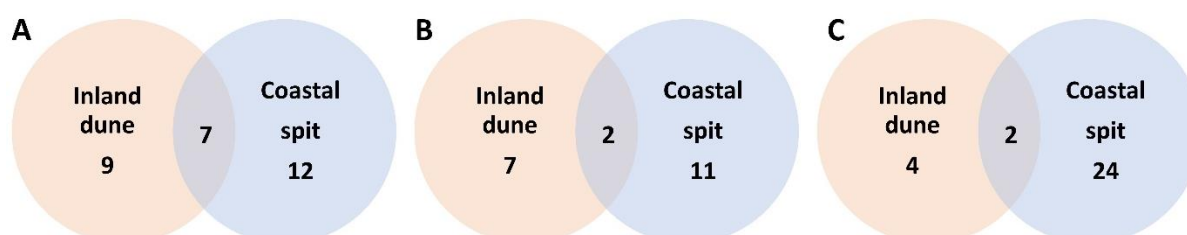

**Table S3:** Lichen species in biocrusts. Listed by the order of lichen-forming fungi (Mycobiont). Columns differentiating between lichens occurrence and characterizing the preliminary settled pH range; Abbreviations: e=extreme, v=very, q=quite, m=moderate.

| Phylum, class, order<br>(Mycobiont) | Species                                            | Occur on | pH range                            |
|-------------------------------------|----------------------------------------------------|----------|-------------------------------------|
| <b>Ascomycota</b>                   |                                                    |          |                                     |
| Lecanoromycetes                     |                                                    |          |                                     |
| Baeomycetales                       | <i>Placynthiella uliginosa</i>                     | Sand     | e.acidoph.-q.acidoph.               |
| Lecanorales                         | <i>Bacidina etayana</i>                            | Litter   |                                     |
|                                     | <i>Cladonia arbuscula</i>                          | Sand     | e.acidoph.-m.acidoph.-(subneutroph) |
|                                     | <i>Cladonia chlorophaea</i>                        | Sand     | (e.acidoph.-)v.acidoph.-m.acidoph.  |
|                                     | <i>Cladonia conista</i>                            | Sand     | acidoph.                            |
|                                     | <i>Cladonia fimbriata</i>                          | Sand     | q.acidoph.-m.acidoph.-(subneutroph) |
|                                     | <i>Cladonia foliacea</i>                           | Sand     | (q.acidoph.-)m.acidoph.             |
|                                     | <i>Cladonia furcata</i>                            | Sand     | q.acidoph.-subneutroph              |
|                                     | <i>Cladonia gracilis</i>                           | Sand     | e.acidoph.-m.acidoph.               |
|                                     | <i>Cladonia humilis</i>                            | Sand     | q.acidoph.-subneutroph              |
|                                     | <i>Cladonia phyllophora</i>                        | Sand     | q.acidoph.-m.acidoph.               |
|                                     | <i>Cladonia portentosa</i>                         | Sand     | e.acidoph.-m.acidoph.-(subneutroph) |
|                                     | <i>Cladonia ramulosa</i>                           | Sand     | v.acidoph.-q.acidoph.               |
|                                     | <i>Cladonia rei</i>                                | Sand     | m.acidoph.-subneutroph              |
|                                     | <i>Cladonia scabriuscula</i>                       | Sand     | m.acidoph.-subneutroph              |
|                                     | <i>Cladonia uncialis</i> ssp.<br><i>biuncialis</i> | Sand     | e.acidoph.-m.acidoph.-(subneutroph) |
|                                     | <i>Evernia prunastri</i>                           | Sand     | v.acidoph.-m.acidoph.               |
|                                     | <i>Hypogymnia physodes</i>                         | Sand     | v.acidoph.-m.acidoph.               |
|                                     | <i>Lecania cyrtella</i>                            | Litter   | subneutroph                         |
|                                     | <i>Myriolecis hagenii</i>                          | Litter   | subneutroph.-basiph.                |
|                                     | <i>Myriolecis persimilis</i>                       | Litter   | subneutroph.-neutroph.              |
|                                     | <i>Micarea misella</i>                             | Litter   | v.acidoph.-q.acidoph.               |
|                                     | <i>Parmelia sulcata</i>                            | Sand     | (q.acidoph.-)m.acidoph.             |
| Peltigerales                        | <i>Peltigera extenuata</i>                         | Sand     | q.acidoph.-subneutroph.             |
| Teloschistales                      | <i>Athallia cerinella</i>                          | Litter   | subneutroph.                        |
|                                     | <i>Physcia tenella</i>                             | Litter   | subneutroph.-m.basiph.              |
|                                     | <i>Xanthoria parietina</i>                         | Litter   | subneutroph.m.basiph.               |

**Figure S3:** Table showing Pearson correlation coefficients to reveal correlations between nutrient contents, which might affect or be affected by the richness of the phototrophic biocrust community. Plot of moss richness in biocrusts over the total phosphorus content in the biocrusts from both sites. The line indicates the best linear fit ( $p = 0.115$  (ANOVA)).

|              | Richness<br>All | Richness<br>Algae | Richness<br>Mosses | Richness<br>Lichens |
|--------------|-----------------|-------------------|--------------------|---------------------|
| Ct<br>(g/kg) | 0.196           | 0.021             | 0.432              | 0.118               |
| Nt<br>(g/kg) | 0.154           | 0.016             | 0.408              | 0.059               |
| Pt<br>(g/kg) | 0.441           | 0.102             | 0.649              | 0.396               |

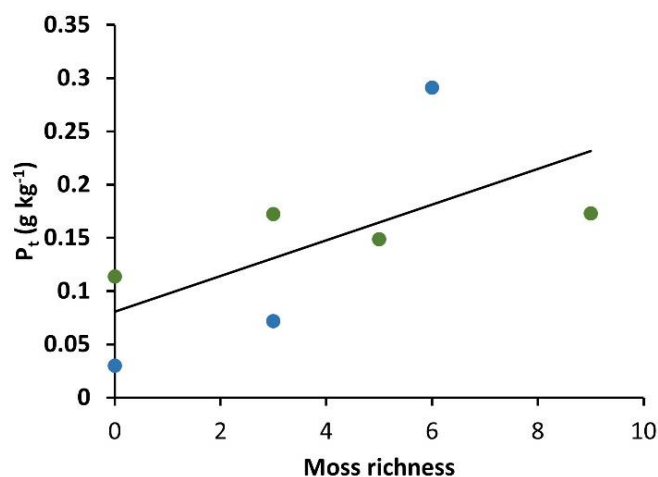

Supplement: s1 [file s1]
